# Supplementary material for: Forensic characteristics and population genetics of Chinese Kazakh ethnic minority with an efficient STR panel
Source: PeerJ journal article supplement (doi:10.7717/peerj.6802), 2019-04-25

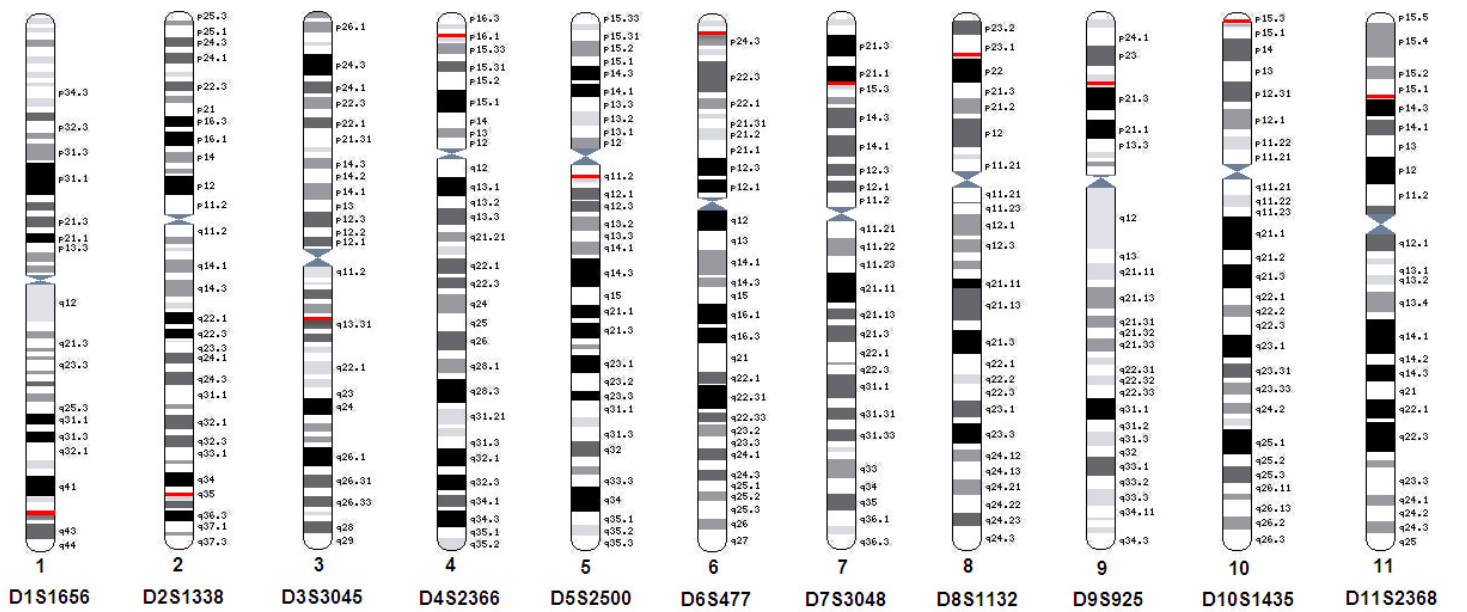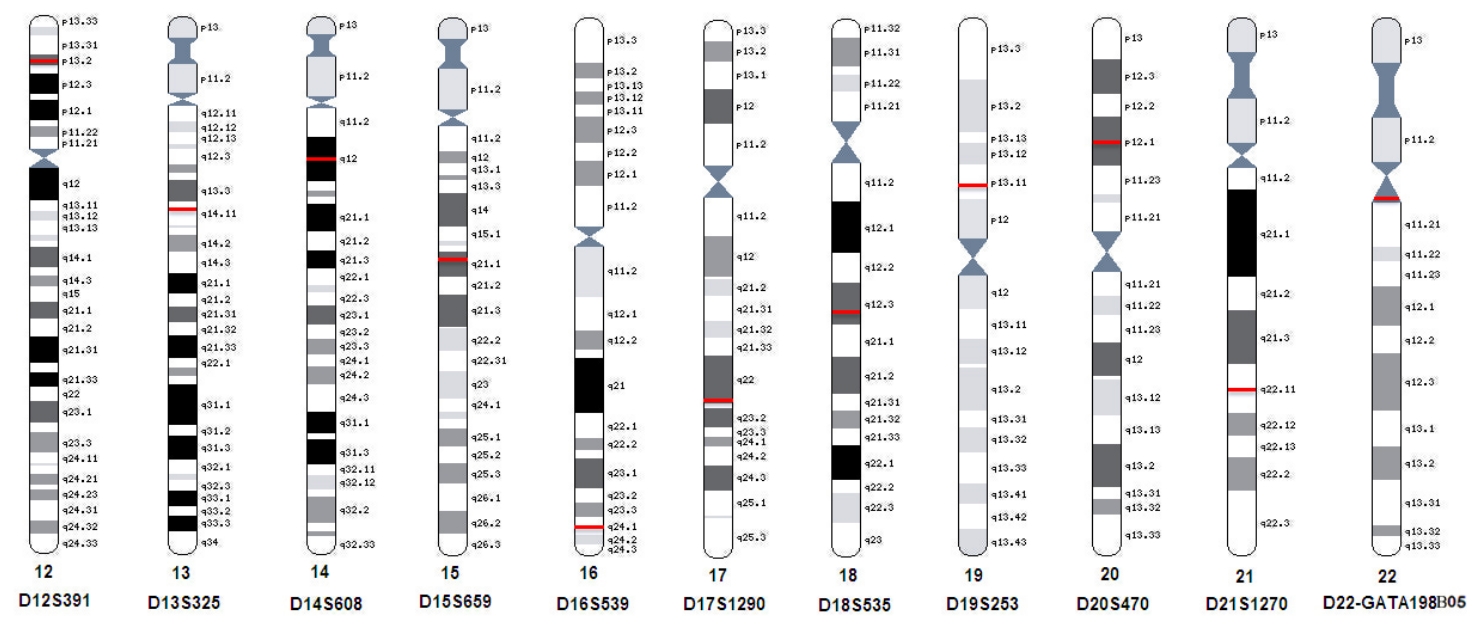

Supplement: Supplementary_Figure_1.pdf [file Supplementary_Figure_1.pdf]
