# Supplementary material for: Forensic characteristics and population genetics of Chinese Kazakh ethnic minority with an efficient STR panel
Source: PeerJ. 2019 Apr 25;7:e6802. doi: 10.7717/peerj.6802 (PMC6487181; doi:10.7717/peerj.6802)
Supplement: Table S3 [file peerj-07-6802-s003.xlsx]

## Sheet: Sheet1
Supplementary Table 3. The DA values of pairwise populations based on raw genotyping data of 22 loci among Chinese Xinjiang Kazakh and five reference populations
Populations	Xinjiang Uygur	Xinjiang Kazakh	Xinjiang Hui	Northern Han	Guangdong Han
Xinjiang Kazakh	0.0076
Xinjiang Hui	0.0104	0.0112
Northern Han	0.0144	0.0136	0.0037
Guangdong Han	0.0227	0.0244	0.013	0.0117
Hainan Li	0.033	0.0337	0.024	0.0221	0.0204
