# Supplementary material for: Forensic characteristics and population genetics of Chinese Kazakh ethnic minority with an efficient STR panel
Source: PeerJ. 2019 Apr 25;7:e6802. doi: 10.7717/peerj.6802 (PMC6487181; doi:10.7717/peerj.6802)
Supplement: Table S4 [file peerj-07-6802-s004.xlsx]

## Sheet: Sheet1
Supplementary Table 4. The Fst (p) values of pairwise populations based on raw genotyping data of 22 loci among Chinese Xinjiang Kazakh and five reference populations
Populations	Xinjiang Uygur	Xinjiang Kazakh	Xinjiang Hui	Northern Han	Guangdong Han
Xinjiang Kazakh	0.0015 (0.0000)
Xinjiang Hui	0.0028 (0.0000)	0.0027 (0.0000)
Northern Han	0.0039 (0.0000)	0.0032 (0.0000)	0.0002 (0.0451)
Guangdong Han	0.0045 (0.0000)	0.0045 (0.0000)	0.0027 (0.0000)	0.0022 (0.0000)
Hainan Li	0.0107 (0.0000)	0.0106 (0.0000)	0.0101 (0.0000)	0.0094 (0.0000)	0.0050 (0.0000)
